# Supplementary material for: Retargeting transposon insertions by the adeno-associated virus Rep protein
Source: PubMed Central journal article supplement — Nucleic Acids Res. 2012 Apr 19;40(14):6693–712. doi: 10.1093/nar/gks317 (PMC3413126; doi:10.1093/nar/gks317), 2012-04-19
Supplement: supp_gks317_nar-00465-d-2012-File011.pdf [file supp_gks317_nar-00465-d-2012-File011.pdf]

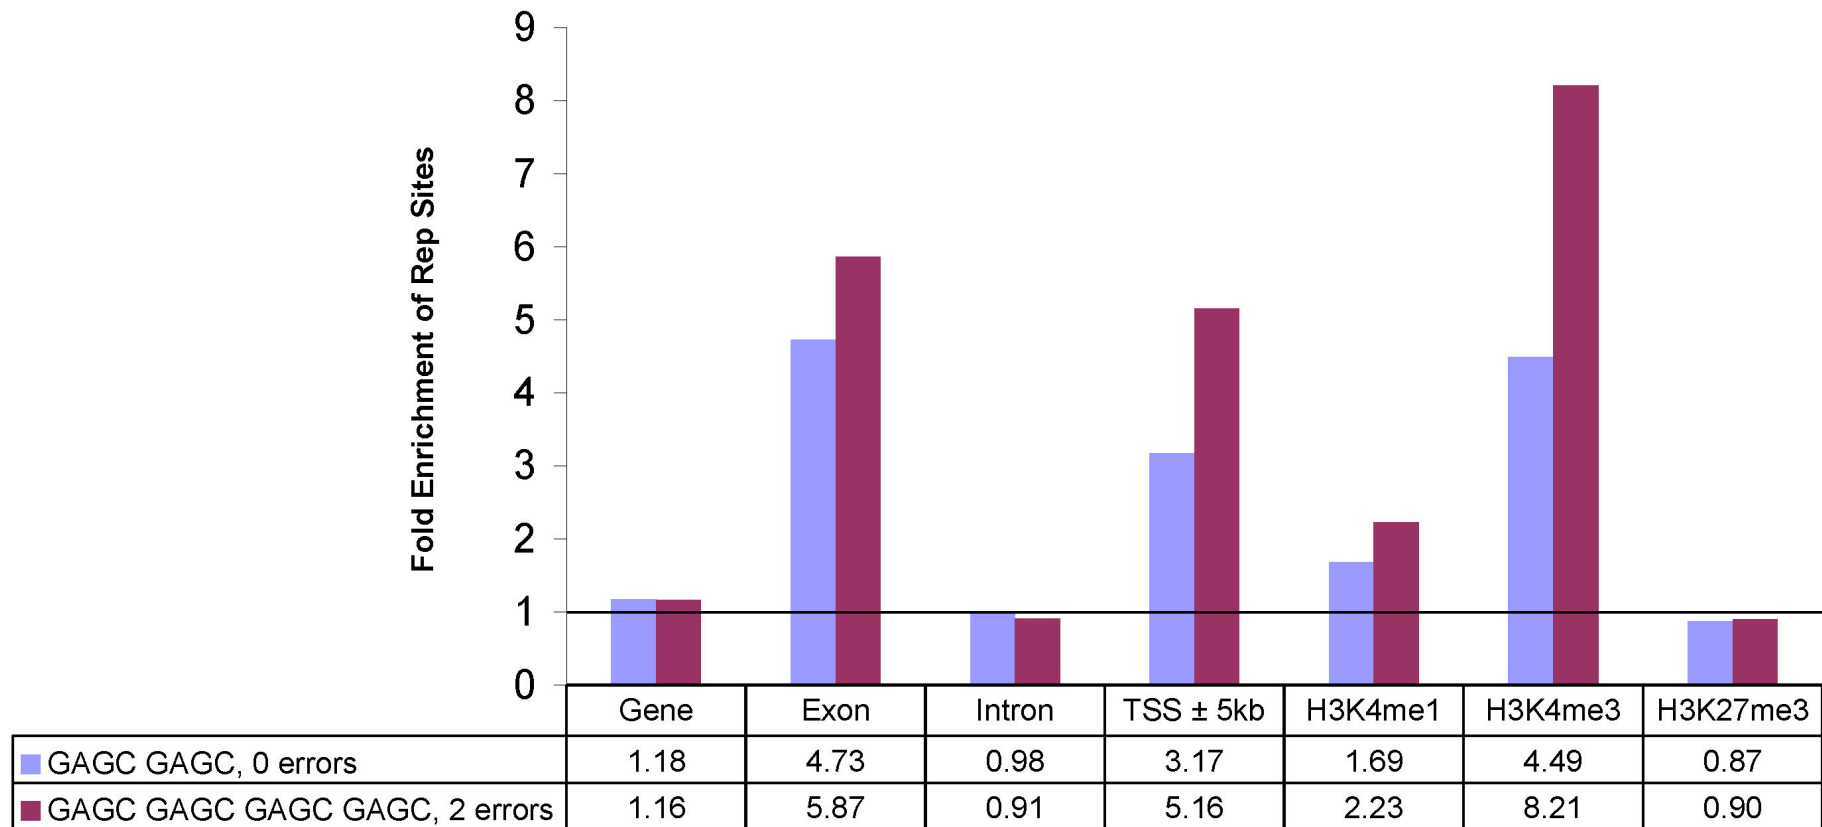

**Supplementary Figure 1. Enrichment of RRS sites in different genomic features as compared to random sites.** RRS sites were mapped with respect to frequencies within genes, exons, introns, in 5-kb windows surrounding transcription start sites (TSS ± 5-kb) and chromosomal regions characterized by H3K4me1, H3K4me3 and H3K27me3 histone modifications. The values are presented as fold-change as compared to random sample, which has a value of 1 and is marked by a horizontal line. The table below the diagram lists the actual values of fold-change compared to random control.

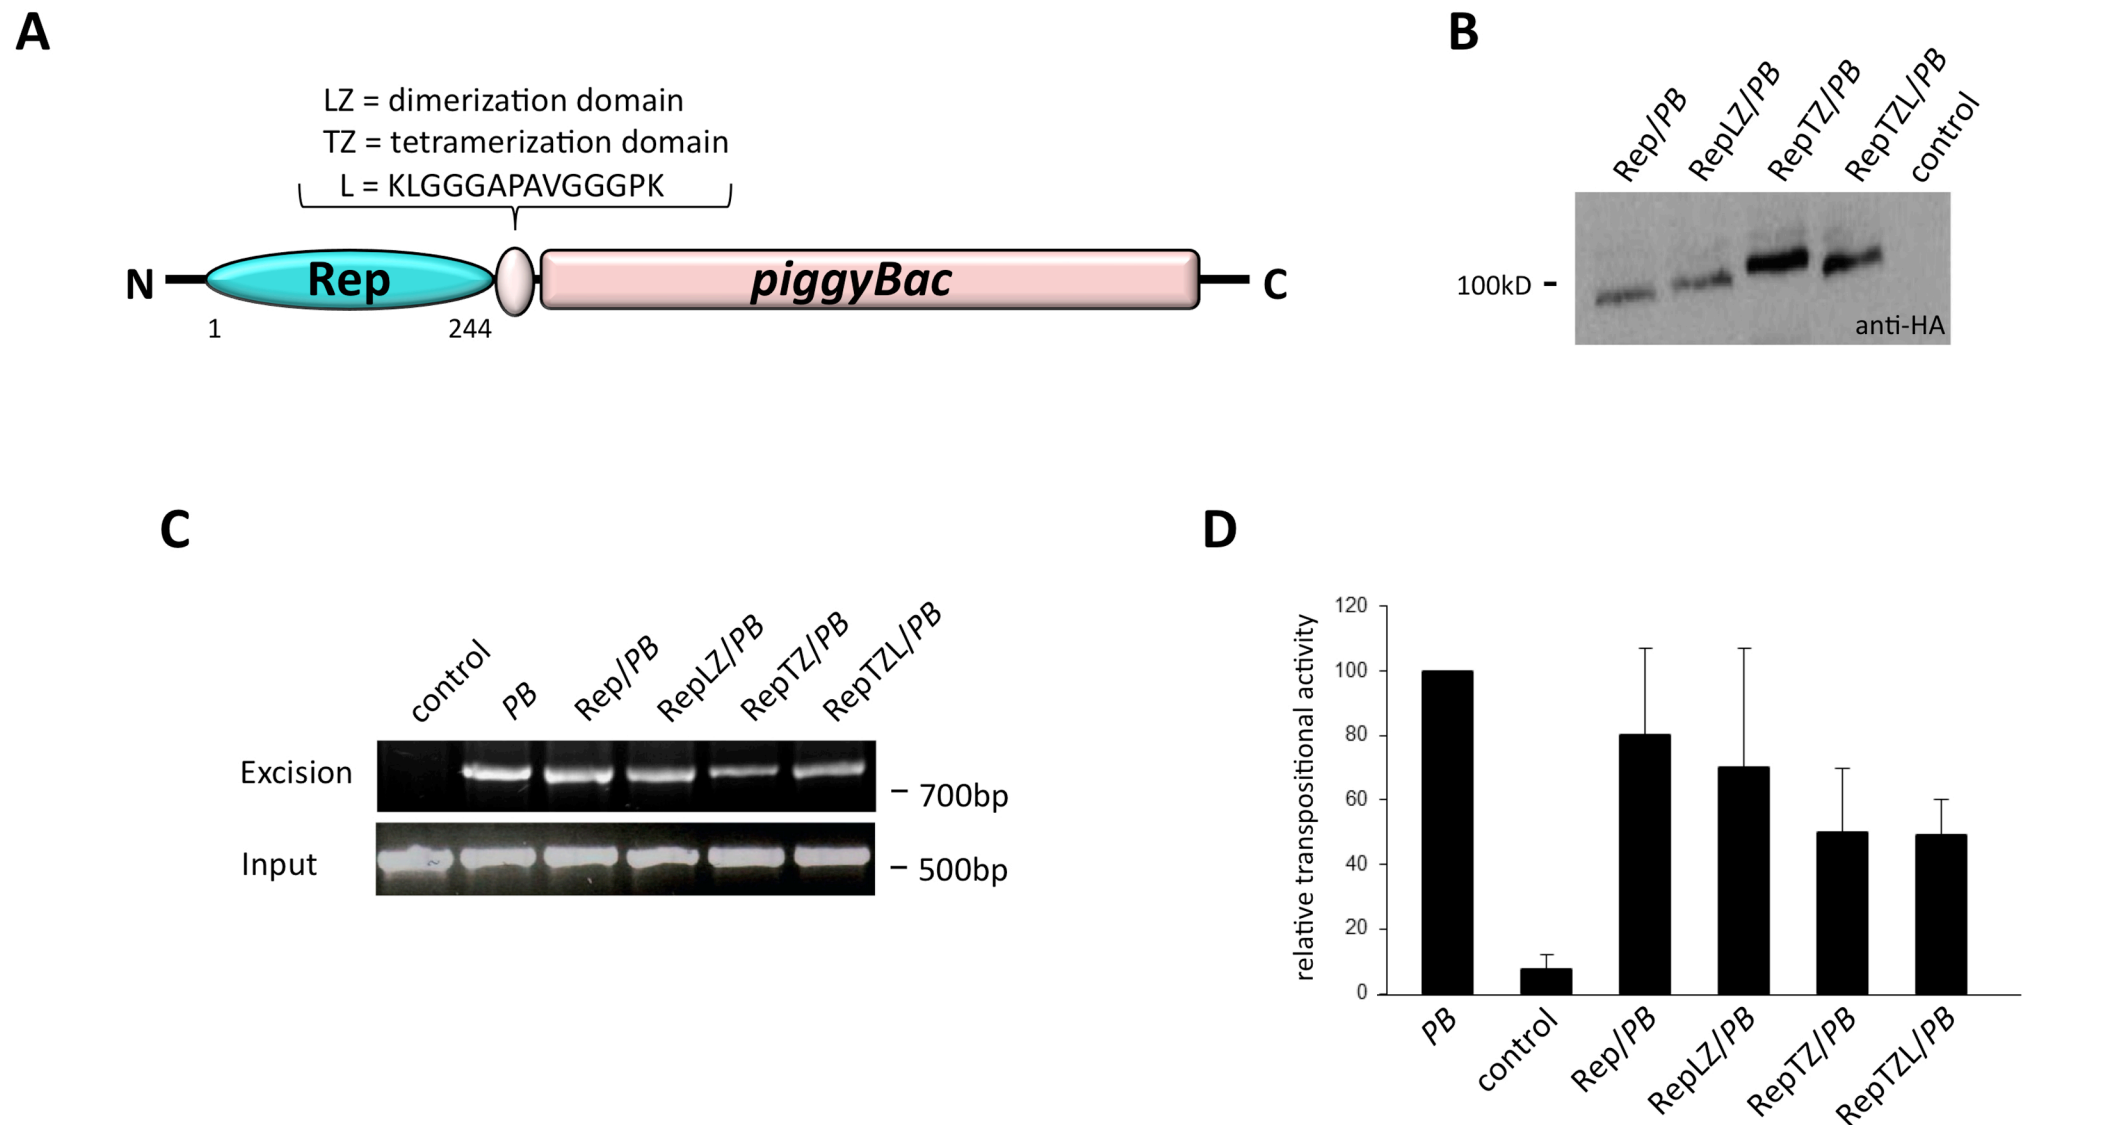

**Supplementary Figure 2. Design, expression and activities of chimeric Rep-PB transposases in human cells. (A)** Schematic overview of Rep/PB chimeras. Each construct contains the Rep DNA-binding domain fused to the PB transposase. The purple oval denotes either a flexible linker (KLG<sub>3</sub>GAPAVGGGPK), a GCN4 wild-type (LZ) or modified leucine zipper (TZ) domain. **(B)** Western blot analysis of Rep/PB fusion expression. Transfected HeLa cells were harvested 48h post-transfection, lysed and subjected to immunoblot analysis using an antibody against the hemagglutinin epitope (anti-HA). **(C)** Excision activity of chimeric Rep/PB transposases. Assay was done as described in **Fig. 3C**. The upper gel picture shows the amplification of a 750-bp footprint product diagnostic of transposon excision. The lower gel photograph shows PCR amplification products of a segment of the neo-marked transposon plasmids that served as input control. The positions of the molecular size markers are indicated on the right. **(D)** PB transposition assay. Rep-PB fusion transposase were tested for their transpositional activity in HeLa cells. The assay was done as described in **Fig. 3D**.

**A*****piggyBac***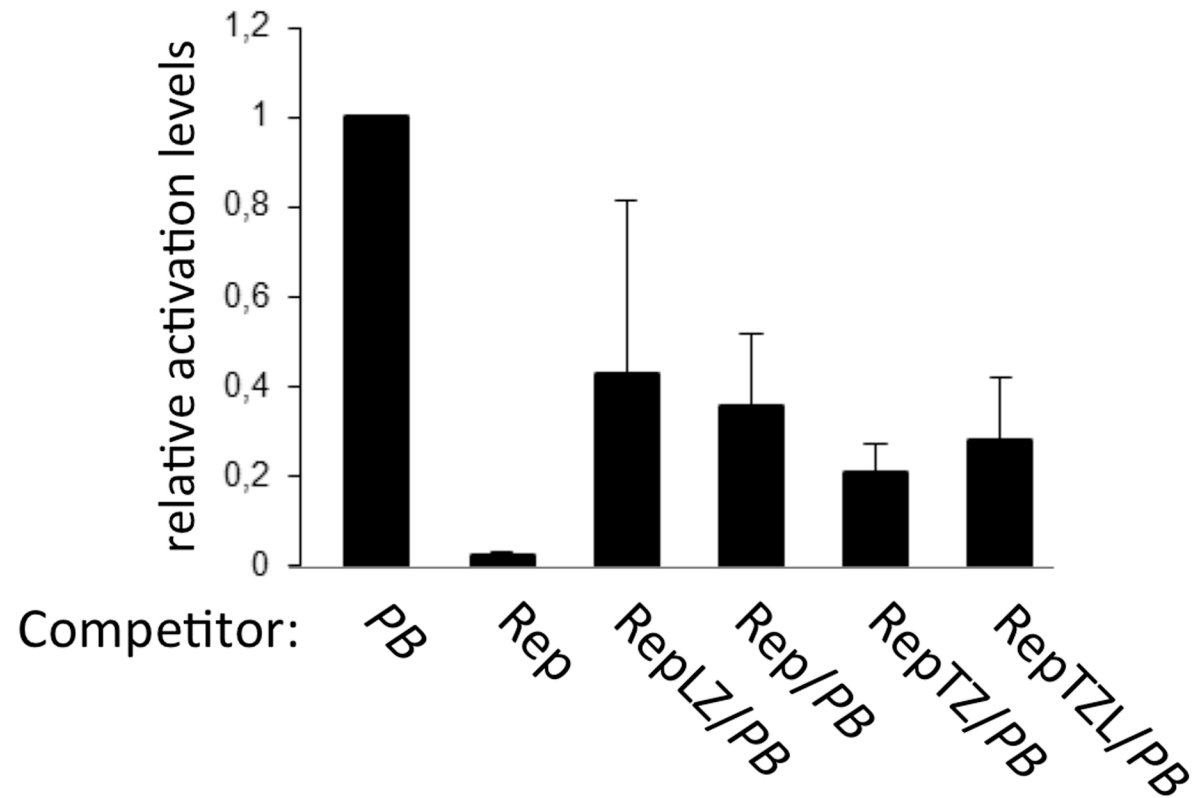**B*****Tol2***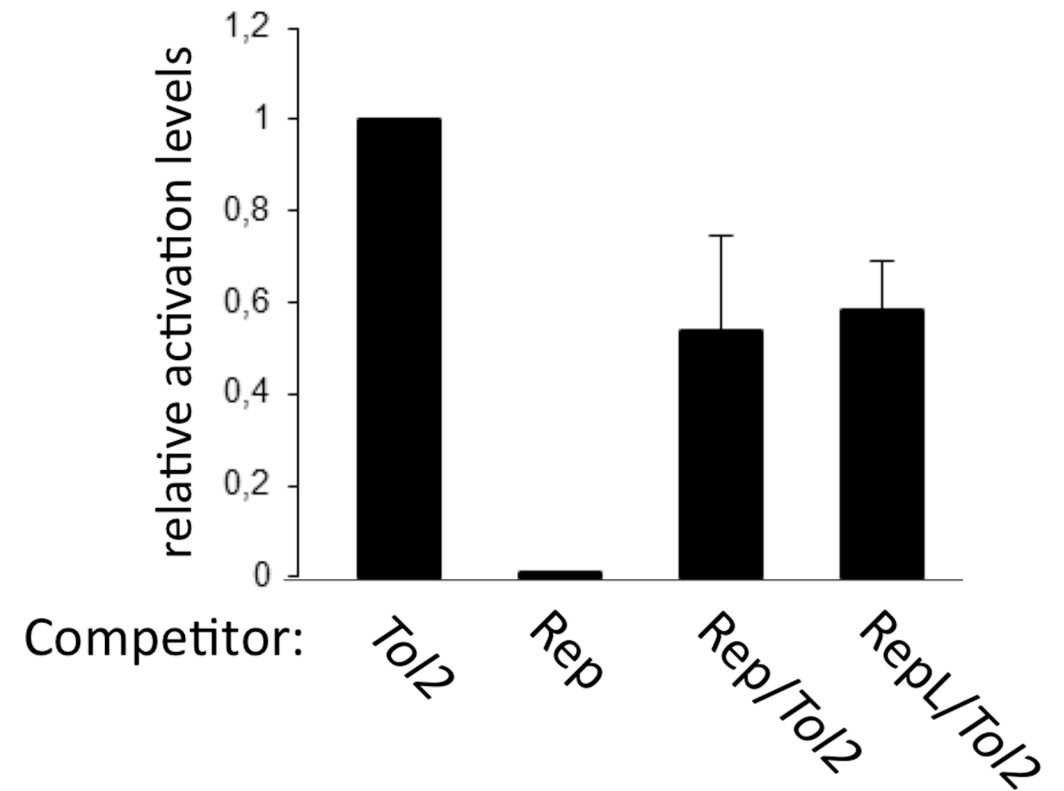

**Supplementary Figure 3. DNA-binding activities of Rep/*PB* and Rep/*Tol2* transposase fusion proteins.** Competition assay to monitor the DNA-binding activities of full-length Rep/*PB* (**A**) and Rep/*Tol2* (**B**) fusion proteins within in human HeLa cells. The assay was done as described in **Fig. 4**.

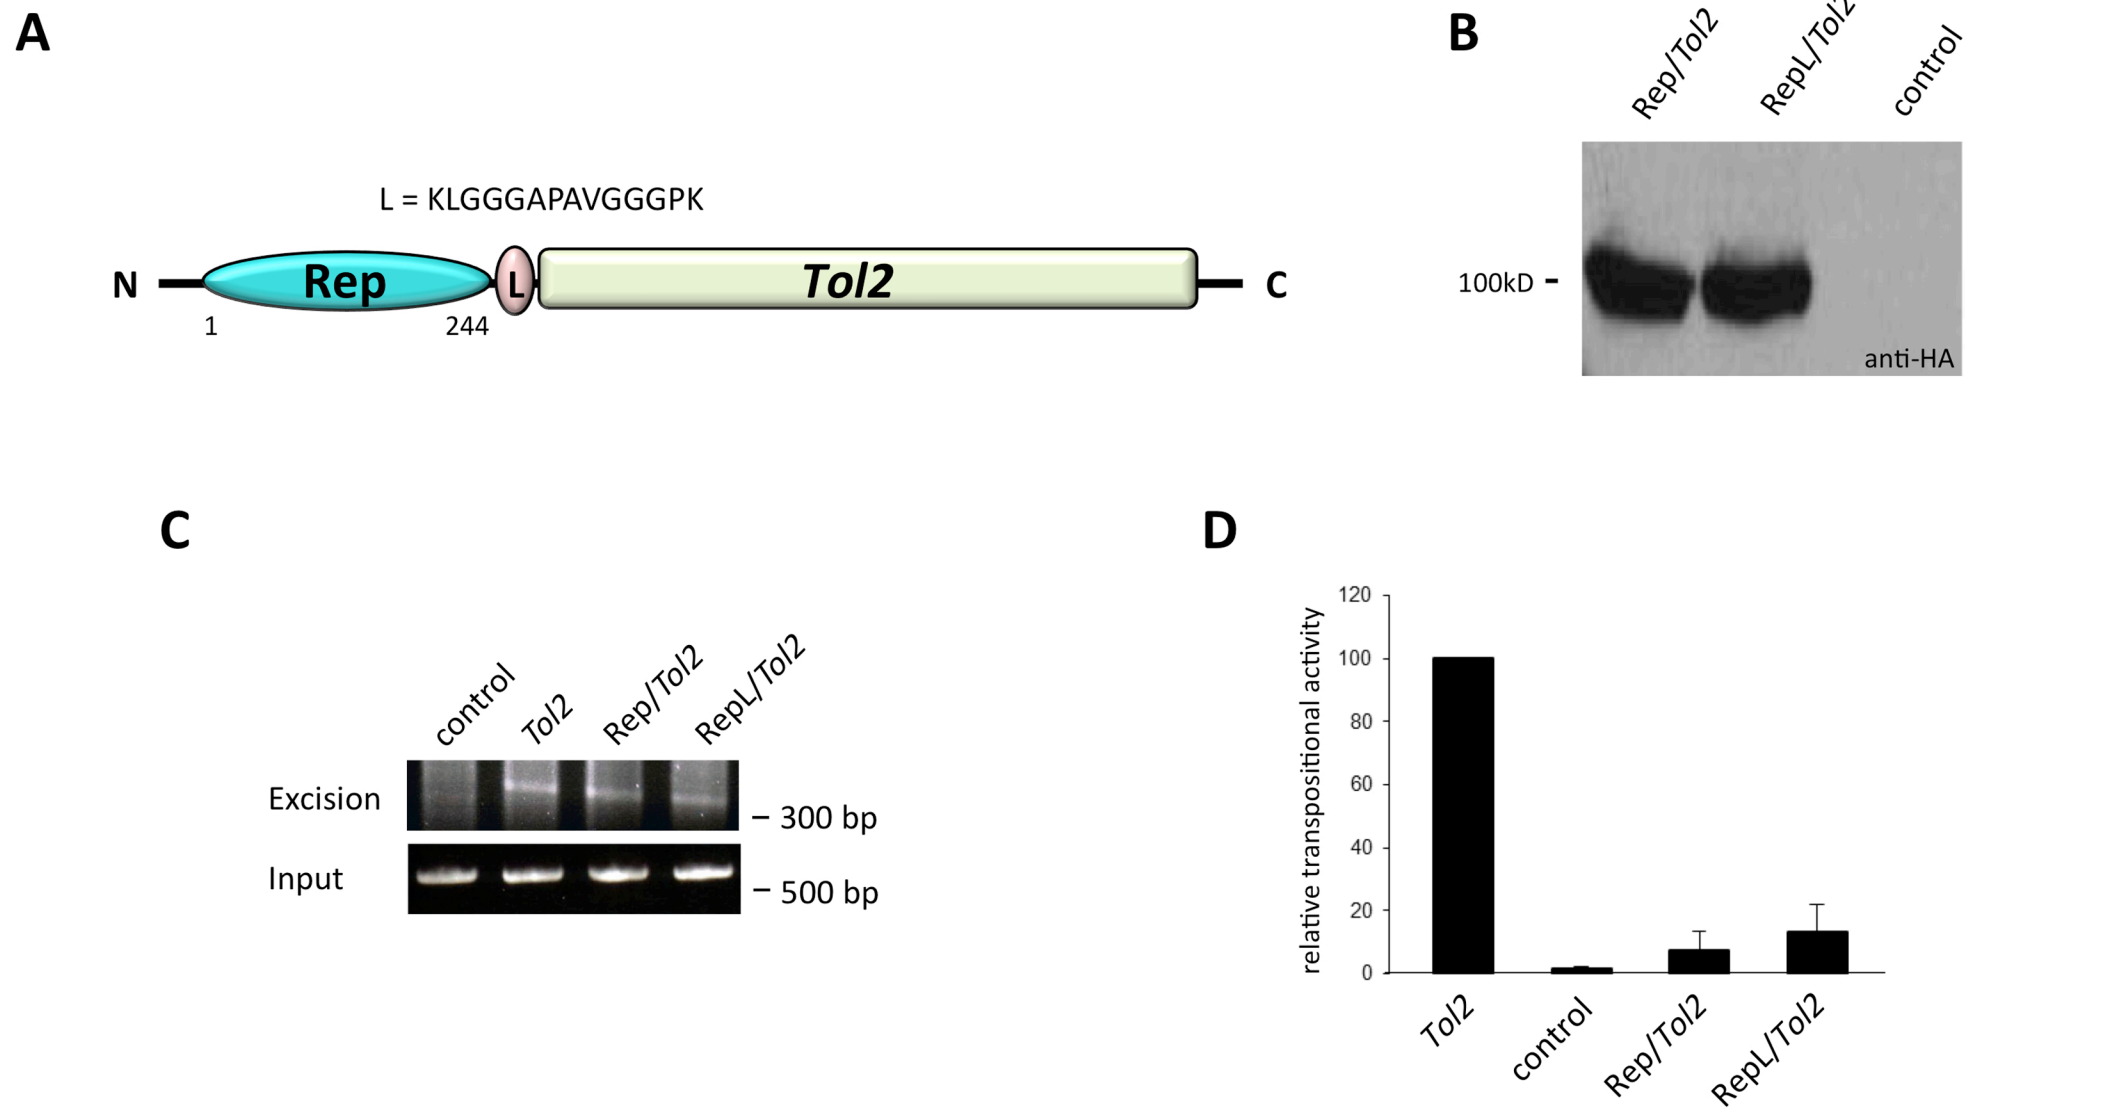

**Supplementary Figure 4. Design, expression and activity of chimeric Rep/ToI2 transposases in human cells. (A)** Schematic overview of Rep/ToI2 chimeras. Each construct contains the Rep DNA-binding domain fused either directly or together with a flexible linker domain (KLGGGAPAVGGGPK) to the ToI2 transposase. **(B)** Western blot analysis of Rep/ToI2 fusion expression. Transfected HeLa cells were harvested 48h post-transfection, lysed and subjected to immunoblot analysis using an antibody against the hemagglutinin epitope (anti-HA). **(C)** Excision activity of chimeric Rep-ToI2 transposases. Assay was done as described in Fig. 3C. The upper gel picture shows the amplification of a 300-bp footprint product diagnostic of transposon excision. The lower gel photograph shows PCR amplification products of a segment of the neo-marked transposon plasmids that served as input control. The positions of the molecular size markers are indicated on the right. **(D)** ToI2 transposition assay. Rep-ToI2 fusion transposase were tested for their transpositional activity in HeLa cells. The assay was done as described in Fig. 3D.

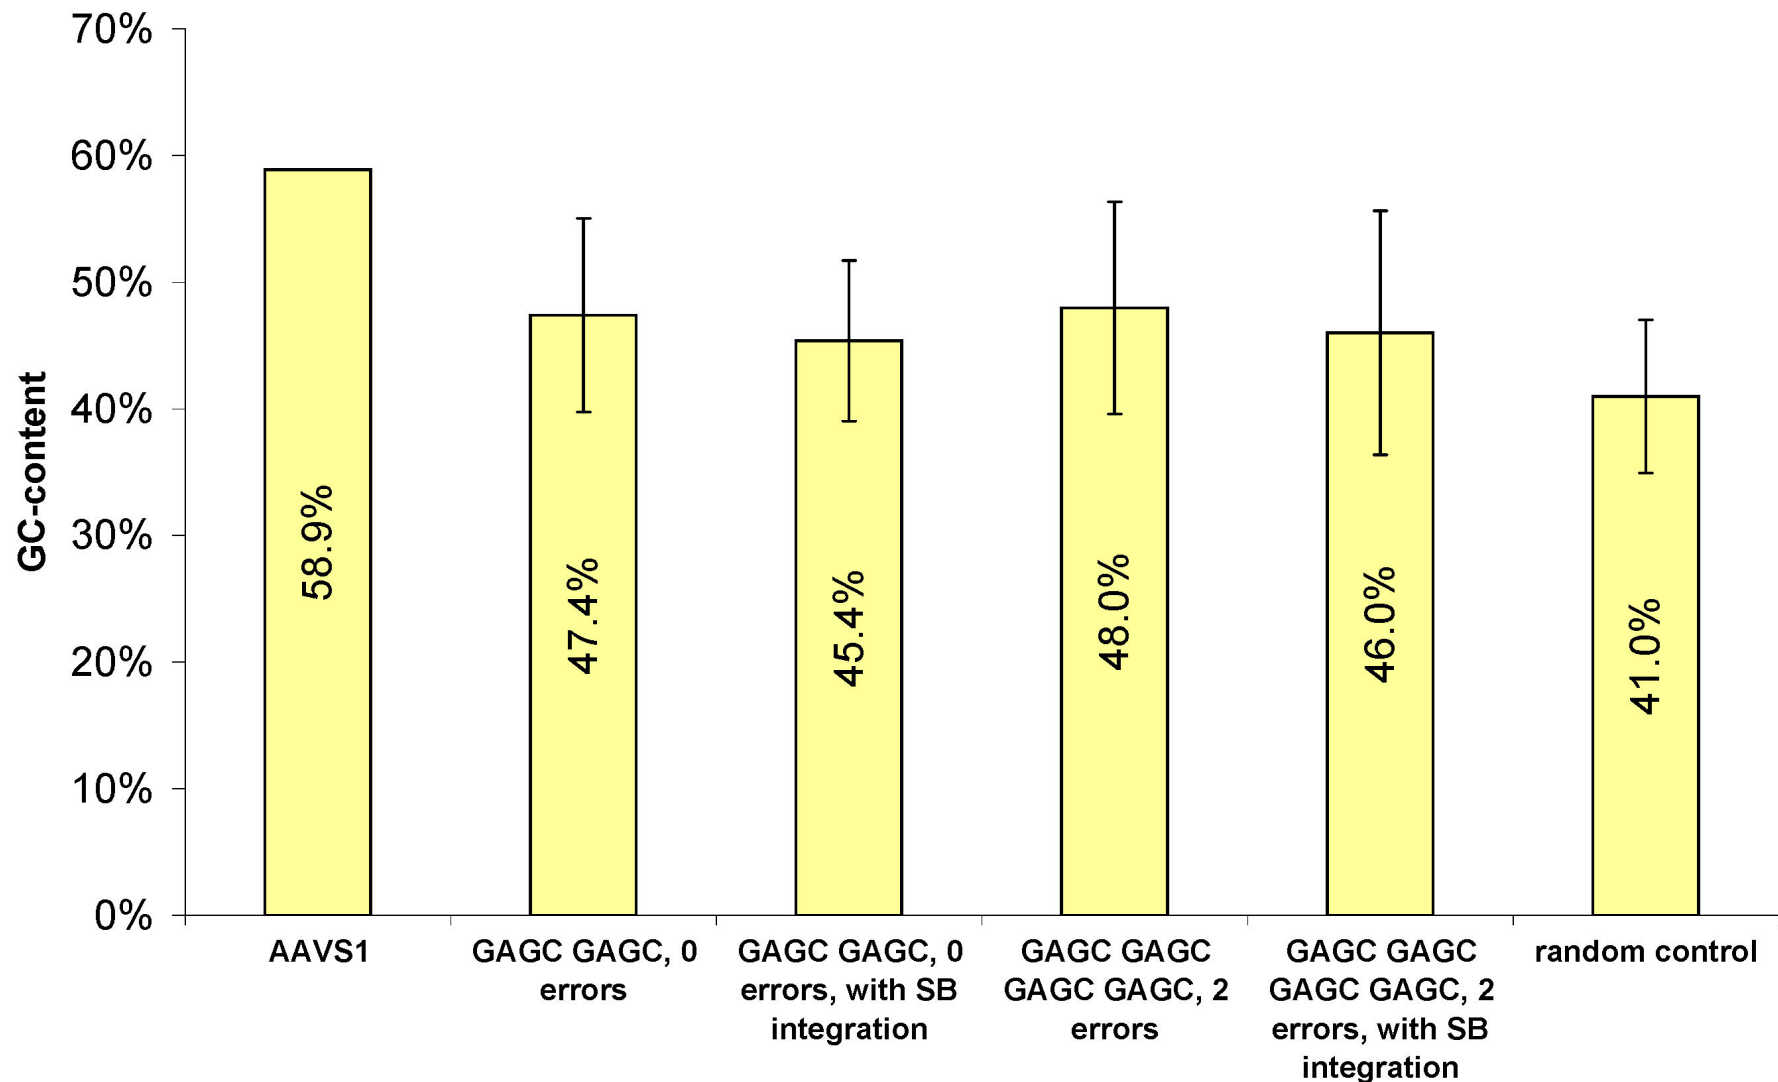

**Supplementary Figure 5. GC-content around RSS sites in the human genome.** Average GC-content  $\pm$  standard deviation in 5-kb windows centered around (1) RSS in *AAVS1*, (2) all “GAGC GAGC” sites in the genome, (3) “GAGC GAGC” sites with Rep/SB +pTneo integration within the 5-kb window, (4) all “GAGC GAGC GAGC GAGC” sites with up to 2 mismatches in the genome, (4) “GAGC GAGC GAGC GAGC” sites with up to 2 mismatches and Rep/N57+pTneoDR3 integration within the 5-kb window, and (5) random control sites.

## SUPPLEMENTARY METHODS

| <b>Primer Name</b>   | <b>Sequence (5'-3'), caps stand for barcodes</b>              |
|----------------------|---------------------------------------------------------------|
| LAM-SB/L-50/Bio      | Biotin-agttttaatgactccaacttaagt                               |
| LAM-PB-R53-Bio       | Biotin-agcaatatttcaagaatgcatgcgt                              |
| LAM-Tol2-L79-Bio     | Biotin-tcaagtaaagtaaaaatccccaaa                               |
| LAM-SB/L-20hmr       | acttaagtgtatgtaaactccgact                                     |
| LAM-PB-R35           | catgcgtcaattttacgcagacta                                      |
| LAM-Tol2-L-48        | cttaagtagcaatcaagtaaattac                                     |
| SBIII-AAAA-OVH       | acactctttccctacacgacgctcttccgatctAAAAGtaaacttccgacttcaactgta  |
| SBIII-CCCA-OVH       | acactctttccctacacgacgctcttccgatctCCCAgtaaacttccgacttcaactgta  |
| SBIII-GGGA-OVH       | acactctttccctacacgacgctcttccgatctGGGAgtaaacttccgacttcaactgta  |
| SBIII-TTTA-OVH       | acactctttccctacacgacgctcttccgatctTTTAgtaaacttccgacttcaactgta  |
| SBIII-GCAG-OVH       | acactctttccctacacgacgctcttccgatctGCAGgtaaacttccgacttcaactgta  |
| SBIII-TACC-OVH       | acactctttccctacacgacgctcttccgatctTACCgtaaacttccgacttcaactgta  |
| SBIII-ATGC-OVH       | acactctttccctacacgacgctcttccgatctATGCgtaaacttccgacttcaactgta  |
| SBIII-CGTC-OVH       | acactctttccctacacgacgctcttccgatctCGTCgtaaacttccgacttcaactgta  |
| Tol2-III-AAAA-OVH    | acactctttccctacacgacgctcttccgatctAAAAactcaagtactttacacctctg   |
| Tol2-III-CCCA-OVH    | acactctttccctacacgacgctcttccgatctCCCAactcaagtactttacacctctg   |
| Tol2-III-GGGA-OVH    | acactctttccctacacgacgctcttccgatctGGGAactcaagtactttacacctctg   |
| PB-III-AAAA-OVH      | acactctttccctacacgacgctcttccgatctAAAAcgcagactatctttctagggttaa |
| PB-III-CCCA-OVH      | acactctttccctacacgacgctcttccgatctCCCAcgcagactatctttctagggttaa |
| PB-III-GGGA-OVH      | acactctttccctacacgacgctcttccgatctGGGAcgcagactatctttctagggttaa |
| PB-III-TTTA-OVH      | acactctttccctacacgacgctcttccgatctTTTAcgcagactatctttctagggttaa |
| Illumina-Primer1     | aatgatacggcgaccaccgagatctacactctttccctacacgacgctcttccgatct*   |
| Illumina-Primer2     | caagcagaagacggcatacagactcttccgatct*                           |
| Sonic TA Link (+)    | gtaatacactcactatagggtccgcttaaggaccatacagactcttccgatct         |
| Sonic Link (-) amino | gatcggaagagctcgtatg-Amino                                     |
| Linker-Primer        | gtaatacactcactatagggc                                         |
| Nested-Primer        | agggtccgcttaaggac                                             |

\*Oligonucleotide sequences © 2006-2010 Illumina, Inc All rights reserved.
